# Supplementary material
Source: PubMed Central journal article supplement (PMC10527989)
Supplement: NIHMS1912835-supplement-Supinfo.pdf [file NIHMS1912835-supplement-Supinfo.pdf]

## SUPPLEMENTARY INFORMATION

### Heterogeneity of the group B streptococcal type VII secretion system and influence on colonization of the female genital tract

**Brady L. Spencer<sup>1</sup>, Alyx M. Job<sup>1</sup>, Clare M. Robertson<sup>2</sup>, Zainab A. Hameed<sup>2</sup>, Camille Serchejian<sup>2</sup>, Caitlin S. Wiafe-Kwakye<sup>3</sup>, Jéssica C. Mendonça<sup>1,4</sup>, Morgan A. Apolonio<sup>1, 5</sup>, Prescilla E. Nagao<sup>4</sup>, Melody N. Neely<sup>3</sup>, Natalia Korotkova<sup>6,7</sup>, Konstantin V. Korotkov<sup>7</sup>, Kathryn A. Patras<sup>2,8</sup>, Kelly S. Doran<sup>\*1</sup>**

<sup>1</sup>University of Colorado-Anschutz, Department of Immunology and Microbiology, Aurora, CO, USA

<sup>2</sup>Department of Molecular Virology and Microbiology, Baylor College of Medicine, Houston, TX, USA.

<sup>3</sup>University of Maine, Molecular & Biomedical Sciences, Orono, ME, USA

<sup>4</sup>Rio de Janeiro State University, Roberto Alcântara Gomes Biology Institute, Rio de Janeiro, RJ, Brazil

<sup>5</sup>National Summer Undergraduate Research Program, University of Arizona, Tucson, AZ, USA.

<sup>6</sup>Department of Microbiology, Immunology and Molecular Genetics, University of Kentucky, Lexington, KY, USA.

<sup>7</sup>Department of Molecular and Cellular Biochemistry, University of Kentucky, Lexington, KY, USA.

<sup>8</sup>Alkek Center for Metagenomics and Microbiome Research, Baylor College of Medicine, Houston, TX, USA.

**\*Corresponding author:**

Kelly S. Doran

Department of Immunology and Microbiology

University of Colorado-Anschutz

Phone 303-724-4240

Email: [kelly.doran@cuanschutz.edu](mailto:kelly.doran@cuanschutz.edu)

**Running title:** GBS T7SS diversity impacts colonization

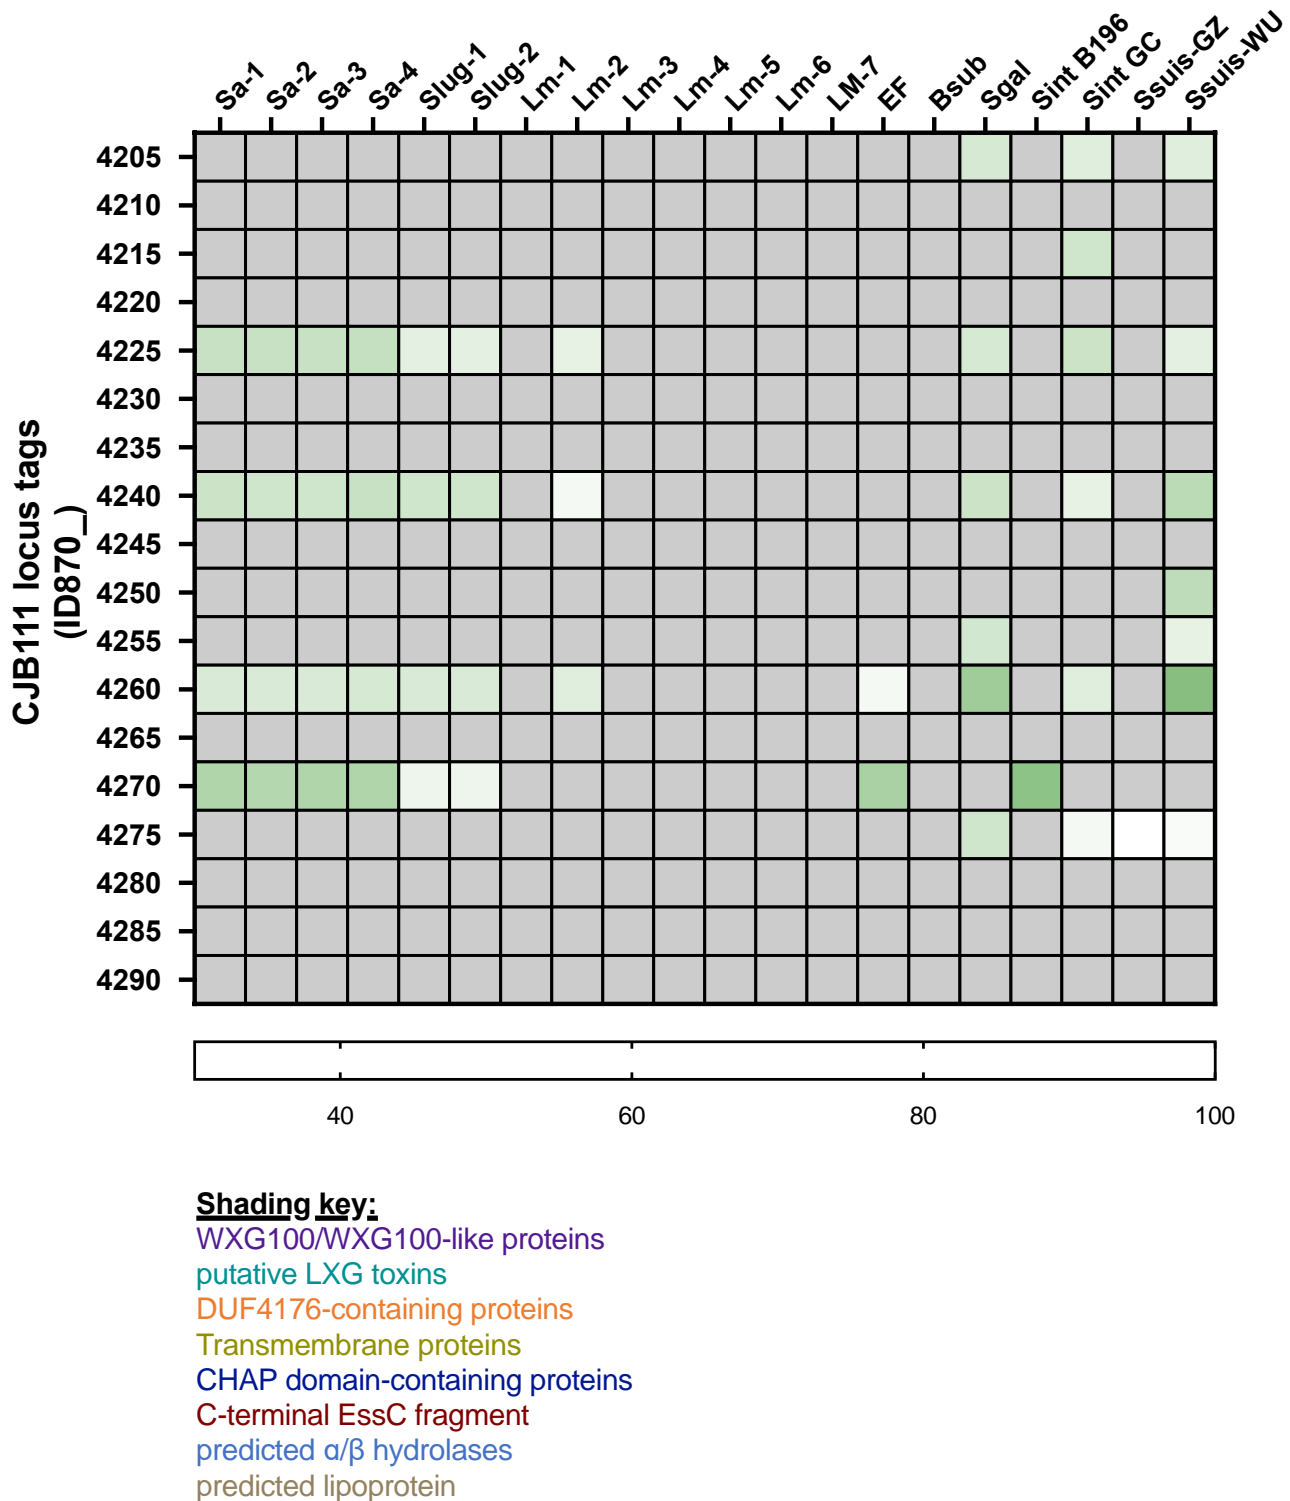

**Supp. Fig. 1. Comparison of GBS T7SS effectors to other Gram-positive organisms.**

Heat map comparing CJB111 T7SS protein homology to a panel of eight Gram-positive organisms in which the T7SSb has been studied previously: *S. aureus* (variants 1-4), *S. lugdunensis* (variants 1, 2), *Listeria monocytogenes* (variants 1-7), *E. faecalis* (strain OG1RF), *Bacillus subtilis* (PY79), *S. gallolyticus* (strain TX20005), *S. intermedius* (strains B196 and GC1825), and *S. suis* (strains GZ5065 and WUSS351). See **Supp. Table 2** for individual strain information. Heat map color intensity is based on Geneious alignment grade, which considers query coverage and percent identity. Shading of the locus tag numbers on the x-axis corresponds to the key for gene color in **Fig 1**. Most downstream CJB111 T7SS effectors have little to no homology across species.

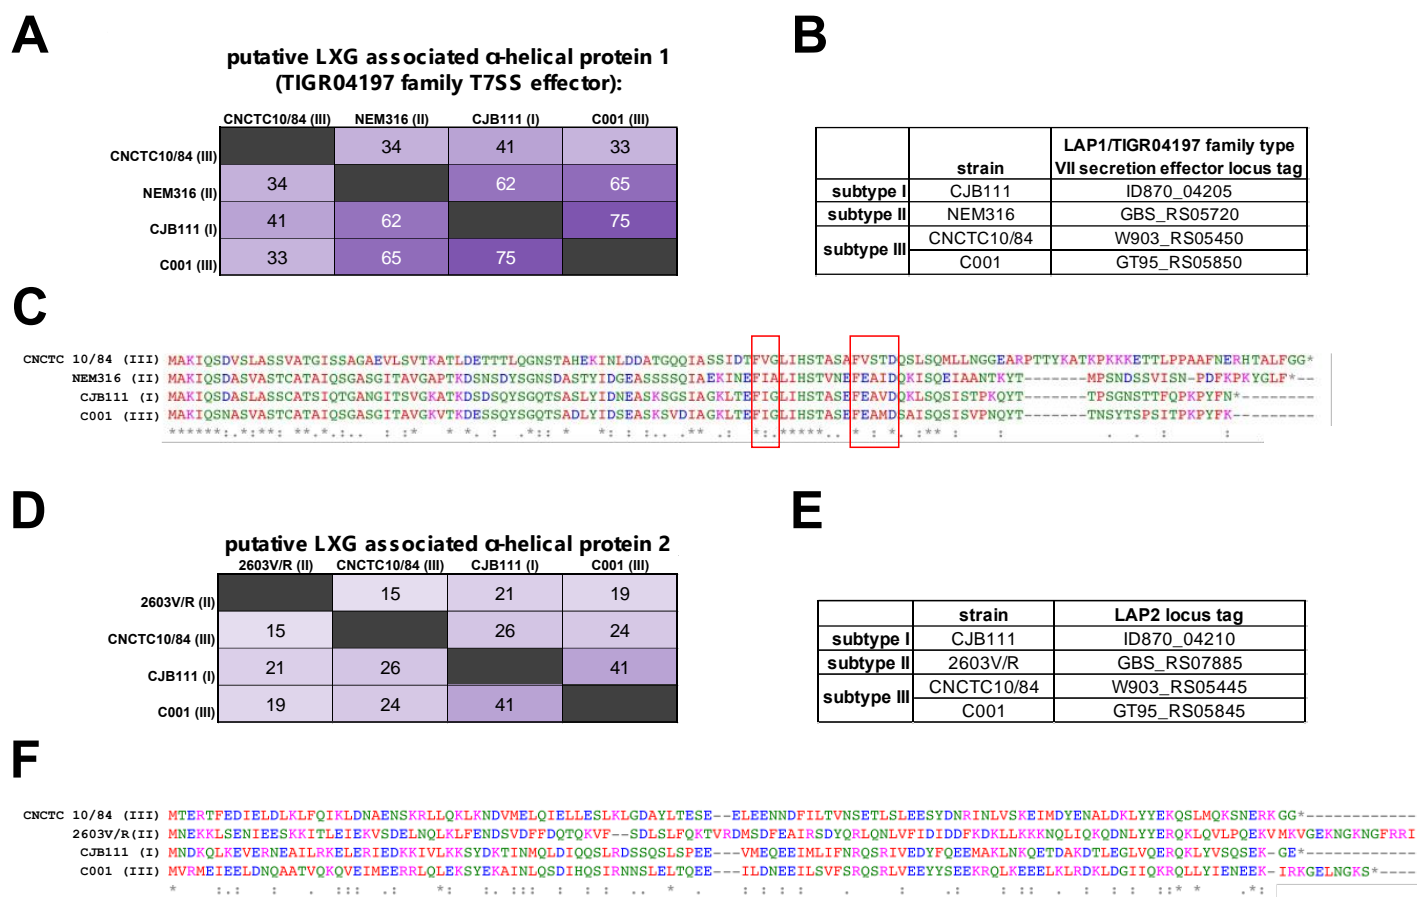

**Supp. Fig. 2. Subtype-specific LXG-associated proteins are encoded by GBS T7SS.**

Percent identity matrices and Clustal Omega alignments of **A-C)** LXG-associated protein 1 (Lap1) and **D-F)** LXG-associated protein 2 (Lap2) sequences from CJB111 (subtype I), 2603V/R (subtype II), CNCTC 10/84 (subtype III), and C001 (subtype III). In the above matrices, the purple shading corresponds to the level of identity between two strains (on a spectrum of 0 to 100% identity), with darker shading indicative of higher percent identity. Conserved putative T7SS-associated FXG and FxxD/E motifs are highlighted by red boxes in **C**.

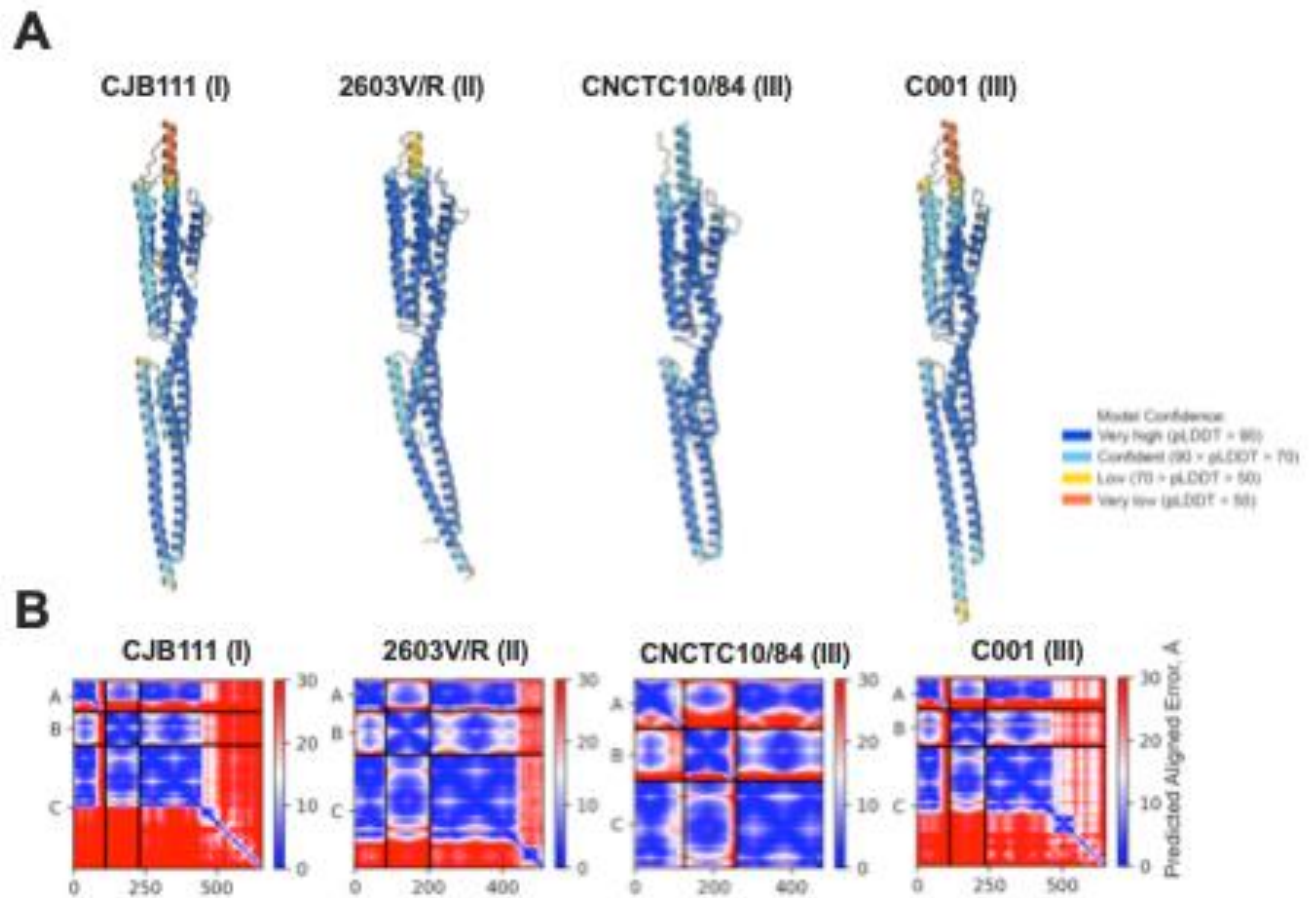

**Supp. Fig. 3. Confidence scores and predicted aligned error for LXG-Lap AlphaFold models in Fig. 2A.** **A)** Predicted LXG-Lap complex models shown in Fig. 2A but with color corresponding to per-residue confidence level (predicted local distance difference test [pLDDT] score 1-100; pLDDT > 90 are expected to be modelled to high accuracy). **B)** Predicted aligned error for each LXG-Lap complex, with colors indicating the confidence of domain positions (higher predicted error in red, lower predicted error in blue).

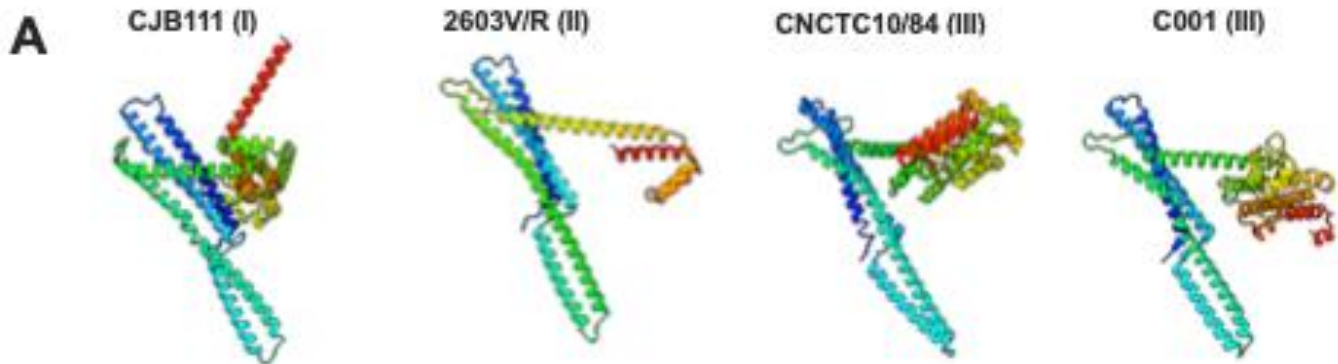

**B** Transmembrane proteins downstream of LXG:

|                  | CNCTC10/84 (III) | C001 (III) | CJB111 (I) | 2603V/R (II) |
|------------------|------------------|------------|------------|--------------|
| CNCTC10/84 (III) |                  | 21         | 20         | 15           |
| C001 (III)       | 21               |            | 22         | 19           |
| CJB111 (I)       | 20               | 22         |            | 31           |
| 2603V/R (II)     | 15               | 19         | 31         |              |

  

|             | strain     | downstream genes locus tag |
|-------------|------------|----------------------------|
| subtype I   | CJB111     | ID870_04220                |
| subtype II  | 2603V/R    | SAG_RS07870                |
| subtype III | CNCTC10/84 | W903_RS05435               |
|             | C001       | GT95_RS05845               |

**C** DUF4176-containing proteins

| subtype I, CJB111       | subtype II, 2603V/R  | subtype III, CNCTC 10/84 | subtype IV, C001 |
|-------------------------|----------------------|--------------------------|------------------|
| ID870_RS04220           | SAG_RS07785          | W903_RS05420             | R028076          |
| ID870_RS04240           | SAG_RS13455 (pseudo) | W903_RS05405             |                  |
| ID870_RS04260           | SAG_RS11090          | W903_RS05385             |                  |
| ID870_RS071205 (pseudo) |                      | W903_RS10490             |                  |

**D**

```

cncrc_10/84_duf2 (5405)  ---HENKILPLGRIYTLKWDGDELHIVTHAAATIERD---GVEYFDYDGYLIFQGHVGFPERVYFFNAHVEEYV---RREARFQGDHIEHIEGRIYF---QWEE---
cncrc_10/84_duf1 (5425)  ---NETINLPIGVVVLNEQR-IEELIVSHQPVYVIN---GHEFFDYAAVSGITGLT-DEEIVFFRHEKIEYV---RGTGPHKEEFVIAKHEHMLHYEIK---GRIFPFI-
cjb111_duf1 (4225)     ---HEKILPIGVVITLKHIS-LPVRLEIARYPLRITK---HIDYFDYDGCIFPQVVT-IRQYTFYFHNDIEYVNTFQIDEHSLAAGVYFQEQIDRIETPFTIIEVNHIEK-
2603v/r_duf1 (7865)    ---SDVINTLGVVIELKSDG-QPVNITSAPFLYDRE---GQGYFDYDGCIFPFIIV-GRS YTFYFLEDIDKVL---RQVYDEHEEKHQKIFL-----
cjb111_duf3 (4260)    HXKREKLLPLGRIYTLKWDG---VLEHIVYDQVYITDQFRTGQLFADYKGLYFAGLD-TEBTLFPQHEKIDSEVY---RCHNDSEEEKFLIYHENEKSI-LFL---VDKITL-
cncrc_10/84_duf3 (5385) ---HWILRHASIVDGN---GQEVYFDYLOGIFPFGSLN-REQVYFPRQEDIDSEVY---RCHNDSEEEKVSLIEKHNKTE-CXKLPQKTYVE---
cjb111_duf2 (4240)    ---MLLPVGSIVYLVLDGN---GRVILRHASIVDGS---GQEVYFDYLOGIFPFGSLN-REQVYFPRQEDIDSEVY---RCHNDSEEEKVSLIEKHNKTE-CXKLPQKTYVE---
COH1_DUFsynth (8875)     ---MLLPVGSIVYLVLDGN---GRVILRHASIVDGS---GQEVYFDYLOGIFPFGSLN-REQVYFPRQEDIDSEVY---RCHNDSEEEKVSLIEKHNKTE-CXKLPQKTYVE---
2603v/r_dufsynth (11090) ---MLLPVGSIVYLVLDGN---GRVILRHASIVDGS---GQEVYFDYLOGIFPFGSLN-REQVYFPRQEDIDSEVY---RCHNDSEEEKVSLIEKHNKTE-CXKLPQKTYVE---
cncrc_10/84_dufsynth (10490) ---MLLPVGSIVYLVLDGN---GRVILRHASIVDGS---GQEVYFDYLOGIFPFGSLN-REQVYFPRQEDIDSEVY---RCHNDSEEEKVSLIEKHNKTE-CXKLPQKTYVE---
    
```

**E**

|                                   | NCTC_DUF2 (5405) | NCTC_DUF1 (5425) | CJB111_DUF1 (4225) | 2603_DUF1 (7865) | CJB111_DUF3 (4260) | NCTC_DUF3 (5385) | CJB111_DUF2 (4240) | COH1_DUF <sub>synth</sub> (8875) | 2603_DUF <sub>synth</sub> (11090) | NCTC_DUF <sub>synth</sub> (10490) |
|-----------------------------------|------------------|------------------|--------------------|------------------|--------------------|------------------|--------------------|----------------------------------|-----------------------------------|-----------------------------------|
| NCTC_DUF2 (5405)                  |                  | 33               | 36                 | 35               | 40                 | 37               | 41                 | 40                               | 40                                | 38                                |
| NCTC_DUF1 (5425)                  | 33               |                  | 34                 | 33               | 35                 | 32               | 37                 | 36                               | 36                                | 31                                |
| CJB111_DUF1 (4225)                | 36               | 34               |                    | 60               | 35                 | 33               | 35                 | 33                               | 33                                | 30                                |
| 2603_DUF1 (7865)                  | 35               | 33               | 60                 |                  | 37                 | 48               | 44                 | 44                               | 44                                | 44                                |
| CJB111_DUF3 (4260)                | 40               | 35               | 35                 | 37               |                    | 56               | 48                 | 46                               | 46                                | 40                                |
| NCTC_DUF_3 (5385)                 | 37               | 32               | 33                 | 48               | 56                 |                  | 77                 | 64                               | 64                                | 62                                |
| CJB111_DUF2 (4240)                | 41               | 37               | 35                 | 44               | 48                 | 77               |                    | 85                               | 85                                | 81                                |
| COH1_DUF <sub>synth</sub> (8875)  | 40               | 36               | 33                 | 44               | 46                 | 64               | 85                 |                                  | 100                               | 94                                |
| 2603_DUF <sub>synth</sub> (11090) | 40               | 36               | 33                 | 44               | 46                 | 64               | 85                 | 100                              |                                   | 94                                |
| NCTC_DUF <sub>synth</sub> (10490) | 38               | 31               | 30                 | 44               | 40                 | 62               | 81                 | 94                               | 94                                |                                   |

**Supp. Fig. 4. Modeling of full-length LXG proteins and homology of downstream putative immunity factor and DUF4176 genes**

**A)** Robetta predicted structures for full-length putative GBS LXG toxins across subtypes I, II, and III. **B)** Percent identity matrix of putative immunity factors (transmembrane domain containing proteins) encoded for downstream of LXG genes in CJB111 (subtype I), 2603V/R (subtype II), CNCTC 10/84 (subtype III), and C001 (subtype III). **C-E)** Percent identity matrices and Clustal Omega alignments of DUF4176 protein sequences from CJB111 (subtype I), 2603V/R (subtype II), CNCTC 10/84 (subtype III), and COH1 (subtype IV). Green highlighting in **C-E** indicate orphaned DUF4176 proteins. A conserved central FXG motif within GBS DUF4176 proteins is highlighted by a red box in **D**. In all of the above percent identity matrices, the purple shading corresponds to the level of identity between two strains (on a spectrum of 0 to 100% identity), with darker shading indicative of higher percent identity.

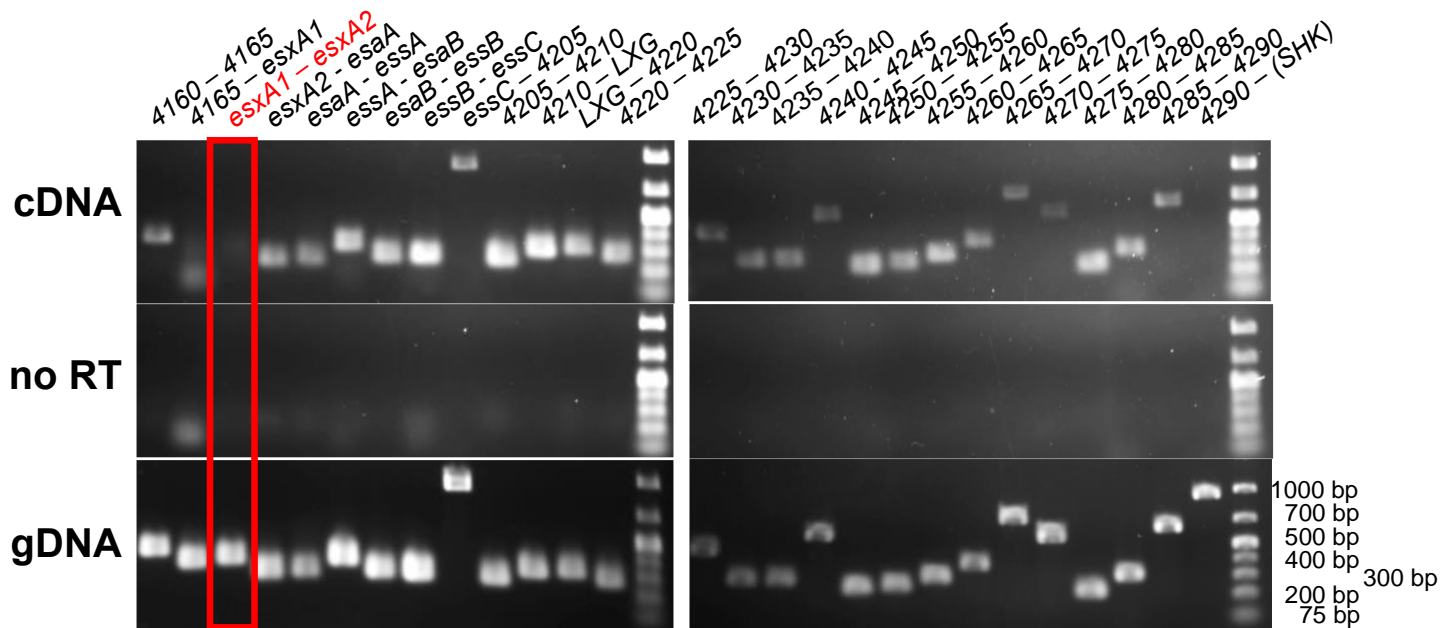

**Supp. Fig. 5. Transcriptional landscape of the CJB111 T7SS locus**

RT-PCR was performed to evaluate transcriptional organization of the CJB111 T7SS locus. Using cDNA as template (and no RT-cDNA and genomic DNA as negative and positive controls, respectively), PCRs were performed using primer pairs spanning every gene junction in the putative T7SS locus. Primers used for these experiments can be found in **Supp. Table 5**. Agarose gels shown are representative of three independent experiments.

**A**

|              |             | GBS WXG100 genes              |                              |                                 |                                |                               |                                       |                                |                                 |
|--------------|-------------|-------------------------------|------------------------------|---------------------------------|--------------------------------|-------------------------------|---------------------------------------|--------------------------------|---------------------------------|
|              |             | subtype I                     |                              | subtype II                      |                                | subtype III                   | subtype IV                            |                                |                                 |
|              |             | <b>CJB111</b><br>(CP063198.2) | <b>A909</b><br>(NC_007432.1) | <b>2603V/R</b><br>(NC_004116.1) | <b>NEM316</b><br>(NC_004368.1) | <b>515</b><br>(NZ_CP051004.1) | <b>CNCTC 10/84</b><br>(NZ_CP006910.1) | <b>COH1</b><br>(NZ_HG939456.1) | <b>BM110</b><br>(NZ_LT714196.1) |
| <b>esxA1</b> | ID870_04170 | SAK_RS05640                   |                              |                                 |                                |                               | W903_RS05485                          | none                           |                                 |
| <b>esxA2</b> | ID870_04175 | SAK_RS05645                   | SAG_RS07925                  | GBS_RS05755                     | GRB95_RS05270                  |                               | W903_RS05490                          |                                |                                 |
| <b>esxA3</b> | ID870_08245 | SAK_RS01430                   | SAG_RS03860                  | GBS_RS01395                     | GRB95_RS01415                  |                               | W903_RS01365                          |                                | BQ8897_RS01705                  |
| <b>esxA4</b> | ID870_10565 | SAK_RS09855                   |                              | GBS_RS10285                     |                                |                               | W903_RS10725*                         |                                |                                 |

orphaned genes in green

\*frameshifted/truncated

**B****Module 1 WXG100 (EsxA3) protein alignment**

|             | CJB111 | A909 | 2603V/R | NEM316 | 515 | CNCTC 10/84 | BM110 |
|-------------|--------|------|---------|--------|-----|-------------|-------|
| CJB111      |        | 100  | 100     | 99     | 99  | 98          | 100   |
| A909        | 100    |      | 100     | 99     | 99  | 98          | 100   |
| 2603V/R     | 100    | 100  |         | 99     | 99  | 98          | 100   |
| NEM316      | 99     | 99   | 99      |        | 100 | 97          | 99    |
| 515         | 99     | 99   | 99      | 100    |     | 97          | 99    |
| CNCTC 10/84 | 98     | 98   | 98      | 97     | 97  |             | 98    |
| BM110       | 100    | 100  | 100     | 99     | 99  | 98          |       |

**C****Module 2 WXG100 (EsxA4) protein alignment**

|             | CJB111 | A909 | NEM316 | CNCTC 10/84 |
|-------------|--------|------|--------|-------------|
| CJB111      |        | 97   | 99     | 98          |
| A909        | 97     |      | 98     | 95          |
| NEM316      | 99     | 98   |        | 97          |
| CNCTC 10/84 | 98     | 95   | 97     |             |

**Supp. Fig. 6. Homology of orphaned GBS WXG100 proteins.**

**A)** Locus tag tables and percent identity matrices of **B)** Orphaned Module 1 WXG100 protein EsxA3 and **C)** Orphaned Module 2 WXG100 protein EsxA4 sequences across a panel of GBS isolates representing T7SS subtypes I-IV. Green highlighting in **A** indicates orphaned WXG100 proteins. In the above matrices (**B-C**), the purple shading corresponds to the level of identity between two strains (on a spectrum of 0 to 100% identity), with darker shading indicative of higher percent identity.



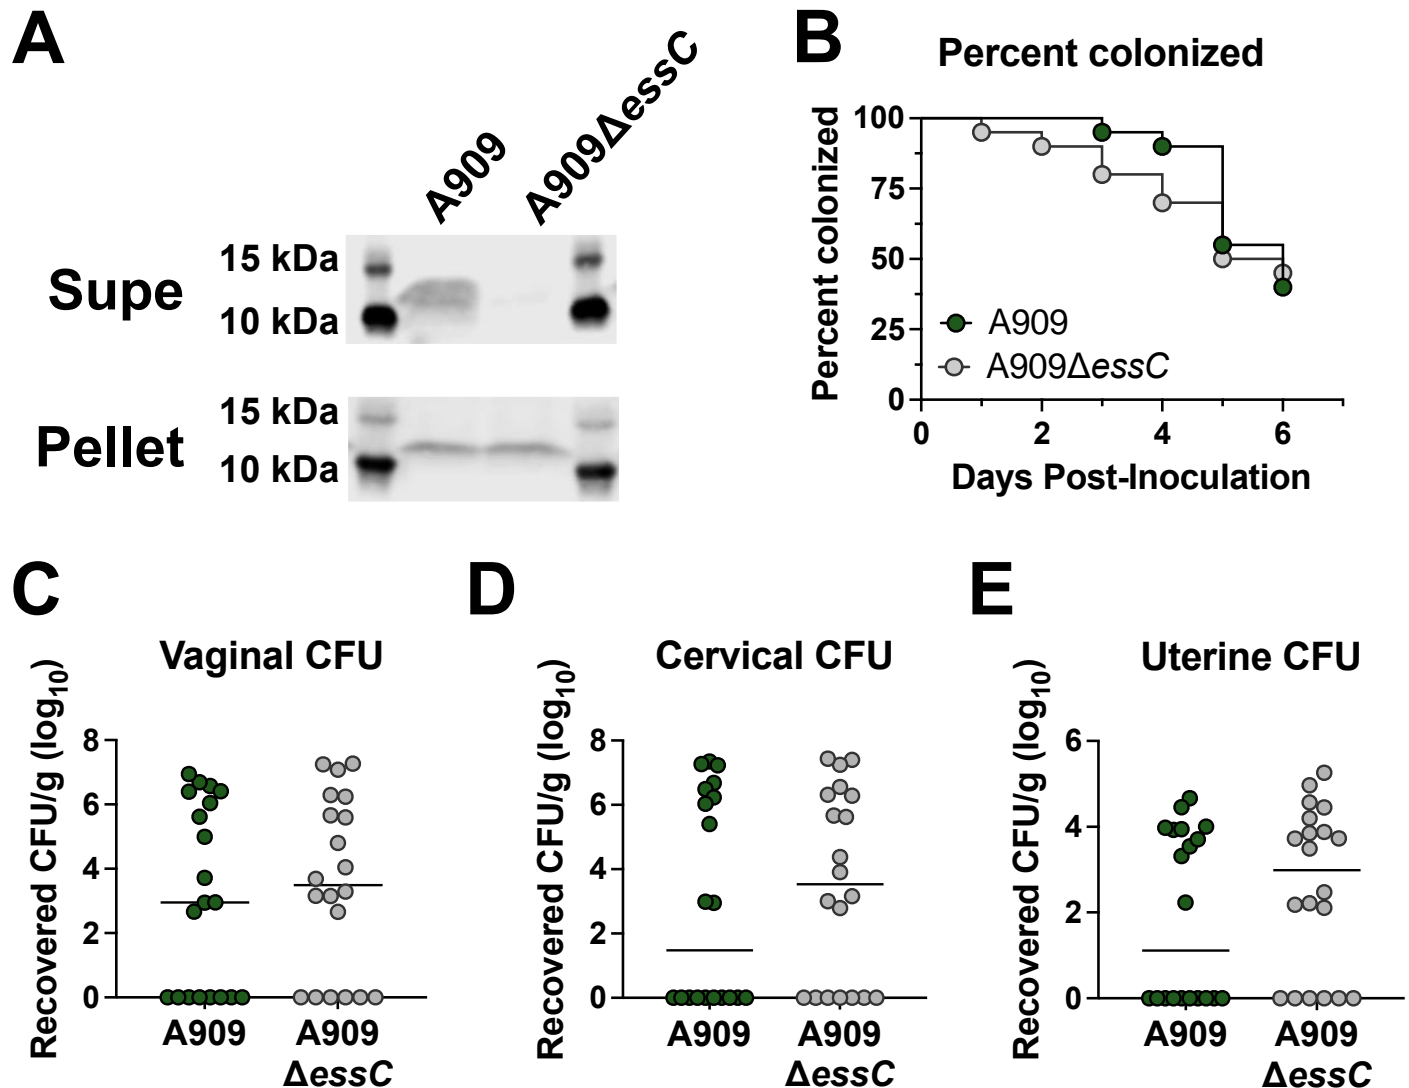

**Supp. Fig 7. Impact of EssC deficiency on GBS vaginal colonization by T7SS subtype I strain A909.** **A)** Western blot showing EssC-dependent secretion of EsxA from subtype I strain A909, *in vitro*. **B)** Percent colonization curve of 8-week-old CD1 female mice vaginally inoculated with subtype I strain A909 or A909 $\Delta$ essC. Statistics reflect the Log rank (Mantel-Cox) test. Recovered CFU counts from the **C)** vaginal **D)** cervical, and **E)** uterine tissue of colonized mice. In panels **C-E**, each dot represents one mouse and two independent experiments' data are combined in these figures (n = 20/group total). Plots show the median and statistics represent the Mann Whitney U test.
